# Supplementary material
Source: Research Square preprint supplement (doi:10.21203/rs.3.rs-8756664/v1)

**Table1:** Class-wise Performance Metrics of SafeRide Model


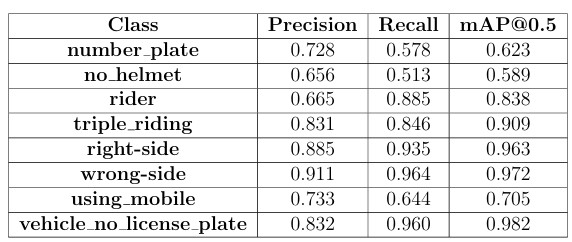


**Table 2:** Overall Model Performance Metrics


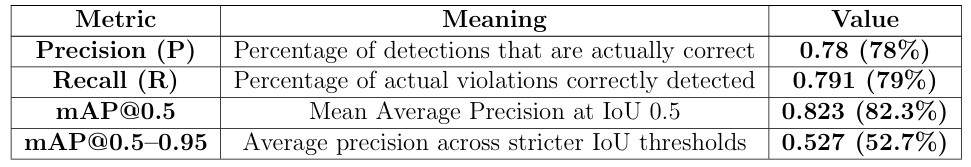

Supplement: Supplementary file 1 [file 56d171c832afeded6f6b472e.docx]
